# Supplementary material for: The relative contributions of species turnover and intraspecific trait variation to community functional composition are determined by functional trait categories following nutrient enrichment
Source: Research Square preprint supplement (doi:10.21203/rs.3.rs-3669827/v1), 2024-01-17
Supplement: Supplementary file 2 [file 590e68bf590bd531e7a9ca2d.xlsx]

## Sheet: N
experiment	tittle	year	reference ID	LONG	LAT	Country	Treatment information	Duration.yr	functional trait	trait category	ITV	turnover	MAT °C	MAP mm	Biome
Wang etal.	The impacts of nitrogen deposition on community N:P stoichiometry do not depend on phosphorus availability in a temperate meadow steppe	2018	1	50°10′ N	119°22′E	China	N addition	4	shoot N	plant chemical trait	0.49245	0	-2.4	360	temperate meadow steppe
Wang etal.	The impacts of nitrogen deposition on community N:P stoichiometry do not depend on phosphorus availability in a temperate meadow steppe	2018	1	50°10′ N	119°22′E	China	N addition	4	shoot P	plant chemical trait	0.049	0	-2.4	360	temperate meadow steppe
Wang etal.	The impacts of nitrogen deposition on community N:P stoichiometry do not depend on phosphorus availability in a temperate meadow steppe	2018	1	50°10′ N	119°22′E	China	P addition	4	shoot N	plant chemical trait	0.0169	0	-2.4	360	temperate meadow steppe
Wang etal.	The impacts of nitrogen deposition on community N:P stoichiometry do not depend on phosphorus availability in a temperate meadow steppe	2018	1	50°10′ N	119°22′E	China	P addition	4	shoot P	plant chemical trait	0.7312	0	-2.4	360	temperate meadow steppe
Wang etal.	The impacts of nitrogen deposition on community N:P stoichiometry do not depend on phosphorus availability in a temperate meadow steppe	2018	1	50°10′ N	119°22′E	China	N+P addition	4	shoot N	plant chemical trait	0.0047	0	-2.4	360	temperate meadow steppe
Wang etal.	The impacts of nitrogen deposition on community N:P stoichiometry do not depend on phosphorus availability in a temperate meadow steppe	2018	1	50°10′ N	119°22′E	China	N+P addition	4	shoot P	plant chemical trait	0.0098	0	-2.4	360	temperate meadow steppe
Wang etal.	Nitrogen enrichment and warming shift community functional composition via distinct mechanisms: The role of intraspecific trait variability and species turnover	2022	2	33°38′N	101°53′E	China	N addition	4	Height	whole-plant trait	0.1437	0.0182	1.2	620	alpine meadow
Wang etal.	Nitrogen enrichment and warming shift community functional composition via distinct mechanisms: The role of intraspecific trait variability and species turnover	2022	2	33°38′N	101°53′E	China	N addition	4	SLA	leaf morphology trait	0.6619	0	1.2	620	alpine meadow
Wang etal.	Nitrogen enrichment and warming shift community functional composition via distinct mechanisms: The role of intraspecific trait variability and species turnover	2022	2	33°38′N	101°53′E	China	N addition	4	LDMC	leaf morphology trait	0.164	0.0121	1.2	620	alpine meadow
Wang etal.	Nitrogen enrichment and warming shift community functional composition via distinct mechanisms: The role of intraspecific trait variability and species turnover	2022	2	33°38′N	101°53′E	China	N addition	4	leaf N	leaf chemical trait	0.9858	0	1.2	620	alpine meadow
Wang etal.	Nitrogen enrichment and warming shift community functional composition via distinct mechanisms: The role of intraspecific trait variability and species turnover	2022	2	33°38′N	101°53′E	China	N addition	4	leaf P	leaf chemical trait	0.6255	0.0142	1.2	620	alpine meadow
Lü etal.	Intraspecific variation drives community-level stoichiometric responses to nitrogen and water enrichment in a temperate steppe	2017	3	43°38 N	116°42 E	China	N addition	2	leaf N	leaf chemical trait	0.332642	0	0.9	355	temperate steppe
Lü etal.	Intraspecific variation drives community-level stoichiometric responses to nitrogen and water enrichment in a temperate steppe	2017	3	43°39 N	116°43 E	China	N addition	2	leaf P	leaf chemical trait	0.0682171	0	0.9	355	temperate steppe
Andrew Siefert and Mark E. Ritchie	Intraspecific trait variation drives functional responses of old‑field plant communities to nutrient enrichment	2016	4	43°2.5′N	76°0.0′W	USA	NPK addition	3	height	whole-plant trait	19.6212	1.21212	4.03	217.3	old fields
Andrew Siefert and Mark E. Ritchie	Intraspecific trait variation drives functional responses of old‑field plant communities to nutrient enrichment	2016	4	43°2.5′N	76°0.0′W	USA	NPK addition	3	SLA	leaf morphology trait	0.0169438	0.0192163	4.03	217.3	old fields
Andrew Siefert and Mark E. Ritchie	Intraspecific trait variation drives functional responses of old‑field plant communities to nutrient enrichment	2016	4	43°2.5′N	76°0.0′W	USA	NPK addition	3	LDMC	leaf morphology trait	0.0148125	0.0241875	4.03	217.3	old fields
Leps etal.	Community trait response to environment: disentangling species turnover vs intraspecific trait variability effects	2011	5	48°57'N	14°36'E	Czech Republic	NPK addition	10	Height	whole-plant trait	0.1292	0.0328228	7.8	620	wet meadow
Leps etal.	Community trait response to environment: disentangling species turnover vs intraspecific trait variability effects	2011	5	48°57'N	14°36'E	Czech Republic	NPK addition	10	SLA	leaf morphology trait	0.4067	0.0956474	7.8	620	wet meadow
Leps etal.	Community trait response to environment: disentangling species turnover vs intraspecific trait variability effects	2011	5	48°57'N	14°36'E	Czech Republic	NPK addition	10	LDMC	leaf morphology trait	0.359284	0	7.8	620	wet meadow
Leps etal.	Community trait response to environment: disentangling species turnover vs intraspecific trait variability effects	2011	5	48°57'N	14°36'E	Czech Republic	NPK addition	10	leaf N	leaf chemical trait	0.4351	0.0241594	7.8	620	wet meadow
Leps etal.	Community trait response to environment: disentangling species turnover vs intraspecific trait variability effects	2011	5	48°57'N	14°36'E	Czech Republic	NPK addition	10	leaf P	leaf chemical trait	0.4923	0.0621334	7.8	620	wet meadow
Leps etal.	Community trait response to environment: disentangling species turnover vs intraspecific trait variability effects	2011	5	48°57'N	14°36'E	Czech Republic	NPK addition	10	leaf C	leaf chemical trait	0	0.05892	7.8	620	wet meadow
Zhou etal	Shift in community functional composition following nitrogen fertilization in an alpine meadow through intraspecific trait variation and community composition change	2018	6	35°580′N	101°530′E	China	N addition	3	Height	whole-plant trait	0.69947	0.108511	1.2	620	alpine meadow
Zhou etal	Shift in community functional composition following nitrogen fertilization in an alpine meadow through intraspecific trait variation and community composition change	2018	6	35°580′N	101°530′E	China	N addition	3	LDMC	leaf morphology trait	0.327698	0.288096	1.2	620	alpine meadow
Zhou etal	Shift in community functional composition following nitrogen fertilization in an alpine meadow through intraspecific trait variation and community composition change	2018	6	35°580′N	101°530′E	China	N addition	3	SLA	leaf morphology trait	0.592124	0.113169	1.2	620	alpine meadow
Zhou etal	Shift in community functional composition following nitrogen fertilization in an alpine meadow through intraspecific trait variation and community composition change	2018	6	35°580′N	101°530′E	China	N addition	3	leaf N	leaf chemical trait	0.333333	0.323899	1.2	620	alpine meadow
Zhou etal	Shift in community functional composition following nitrogen fertilization in an alpine meadow through intraspecific trait variation and community composition change	2018	6	35°580′N	101°530′E	China	N addition	3	leaf P	leaf chemical trait	0.439076	0.119844	1.2	620	alpine meadow
Zhou etal	Shift in community functional composition following nitrogen fertilization in an alpine meadow through intraspecific trait variation and community composition change	2018	6	35°580′N	101°530′E	China	N addition	4	Height	whole-plant trait	0.0818345	0.514988	1.2	620	alpine meadow
Zhou etal	Shift in community functional composition following nitrogen fertilization in an alpine meadow through intraspecific trait variation and community composition change	2018	6	35°580′N	101°530′E	China	N addition	4	LDMC	leaf morphology trait	0.0250126	0.72764	1.2	620	alpine meadow
Zhou etal	Shift in community functional composition following nitrogen fertilization in an alpine meadow through intraspecific trait variation and community composition change	2018	6	35°580′N	101°530′E	China	N addition	4	SLA	leaf morphology trait	0.4355	0.1417	1.2	620	alpine meadow
Zhou etal	Shift in community functional composition following nitrogen fertilization in an alpine meadow through intraspecific trait variation and community composition change	2018	6	35°580′N	101°530′E	China	N addition	4	leaf N	leaf chemical trait	0.391072	0.156677	1.2	620	alpine meadow
Zhou etal	Shift in community functional composition following nitrogen fertilization in an alpine meadow through intraspecific trait variation and community composition change	2018	6	35°580′N	101°530′E	China	N addition	4	leaf P	leaf chemical trait	0.753231	0.083468	1.2	620	alpine meadow
Zhou etal	Shift in community functional composition following nitrogen fertilization in an alpine meadow through intraspecific trait variation and community composition change	2018	6	35°580′N	101°530′E	China	N addition	5	Height	whole-plant trait	0.0311256	0.72747	1.2	620	alpine meadow
Zhou etal	Shift in community functional composition following nitrogen fertilization in an alpine meadow through intraspecific trait variation and community composition change	2018	6	35°580′N	101°530′E	China	N addition	5	LDMC	leaf morphology trait	0.195911	0.383262	1.2	620	alpine meadow
Zhou etal	Shift in community functional composition following nitrogen fertilization in an alpine meadow through intraspecific trait variation and community composition change	2018	6	35°580′N	101°530′E	China	N addition	5	SLA	leaf morphology trait	0.0809081	0.689569	1.2	620	alpine meadow
Zhou etal	Shift in community functional composition following nitrogen fertilization in an alpine meadow through intraspecific trait variation and community composition change	2018	6	35°580′N	101°530′E	China	N addition	5	leaf N	leaf chemical trait	0.509329	0.109447	1.2	620	alpine meadow
Zhou etal	Shift in community functional composition following nitrogen fertilization in an alpine meadow through intraspecific trait variation and community composition change	2018	6	35°580′N	101°530′E	China	N addition	5	leaf P	leaf chemical trait	0.587679	0.0600083	1.2	620	alpine meadow
Zhou etal	Shift in community functional composition following nitrogen fertilization in an alpine meadow through intraspecific trait variation and community composition change	2018	6	35°580′N	101°530′E	China	N addition	6	Height	whole-plant trait	0.0693347	0.545273	1.2	620	alpine meadow
Zhou etal	Shift in community functional composition following nitrogen fertilization in an alpine meadow through intraspecific trait variation and community composition change	2018	6	35°580′N	101°530′E	China	N addition	6	LDMC	leaf morphology trait	0.202963	0.383184	1.2	620	alpine meadow
Zhou etal	Shift in community functional composition following nitrogen fertilization in an alpine meadow through intraspecific trait variation and community composition change	2018	6	35°580′N	101°530′E	China	N addition	6	SLA	leaf morphology trait	0.124831	0.464745	1.2	620	alpine meadow
Zhou etal	Shift in community functional composition following nitrogen fertilization in an alpine meadow through intraspecific trait variation and community composition change	2018	6	35°580′N	101°530′E	China	N addition	6	leaf N	leaf chemical trait	0.358043	0.188379	1.2	620	alpine meadow
Zhou etal	Shift in community functional composition following nitrogen fertilization in an alpine meadow through intraspecific trait variation and community composition change	2018	6	35°580′N	101°530′E	China	N addition	6	leaf P	leaf chemical trait	0.568481	0.0692805	1.2	620	alpine meadow
